# Supplementary material for: Cobalt–molybdenum interaction in oxidic precursors of zeolite-supported HDS catalystsElectronic supplementary information (ESI) available: The comparisons between the experimental and simulated Mo K-edge EXAFS spectra. See http://www.rsc.org/suppdata/cp/b2/b201785g/
Source: Royal Society of Chemistry journal article supplement (doi:10.1039/b201785g), 2002-07-02
Supplement: figures.doc [file figures.doc]

Cobalt-Molybdenum Interaction in Oxidic Precursors of Zeolite-Supported HDS Catalysts

**Electronic Supplementary Information**

Guillaume Plazenet a, b, Edmond Payen a, John Lynch b

*a: Laboratoire de Catalyse de Lille, UPRESA CNRS 8010, Université des Sciences et Technologies de Lille, Bât. C3, 59655 Villeneuve d’Ascq Cedex, France*

*b: Institut Français du Pétrole, 1 et 4, Avenue de Bois-Préau, 92852 Rueil-Malmaison Cedex, France*

**Figure captions**

Fig. S1: Comparison between the Mo K-edge EXAFS spectrum of Co+Mo/ZD and its fit.

Fig. S2: Comparison between the Mo K-edge EXAFS spectrum of CoMo6/ZD and its fit.

Fig. S3: Comparison between the Co K-edge EXAFS spectrum of Co+Mo/ZR and its fit.

Fig. S4: Comparison between the Co K-edge EXAFS spectrum of CoMo6/ZD and its fit.

Figure S1.

Figure S2.

Figure S3.

Figure S4.
